# Supplementary material for: Hydroclimate of the Last Glacial Maximum and deglaciation in southern Australia’s arid margin interpreted from speleothem records (23–15 ka)
Source: Copernicus journal article supplement (doi:10.5194/cp-2016-135), 2016-12-21
Supplement: Supplementary file [file cp-2016-135-AC3-supplement.pdf]

**Below:** Wavelet analysis in response to Reviewer 4, L531.

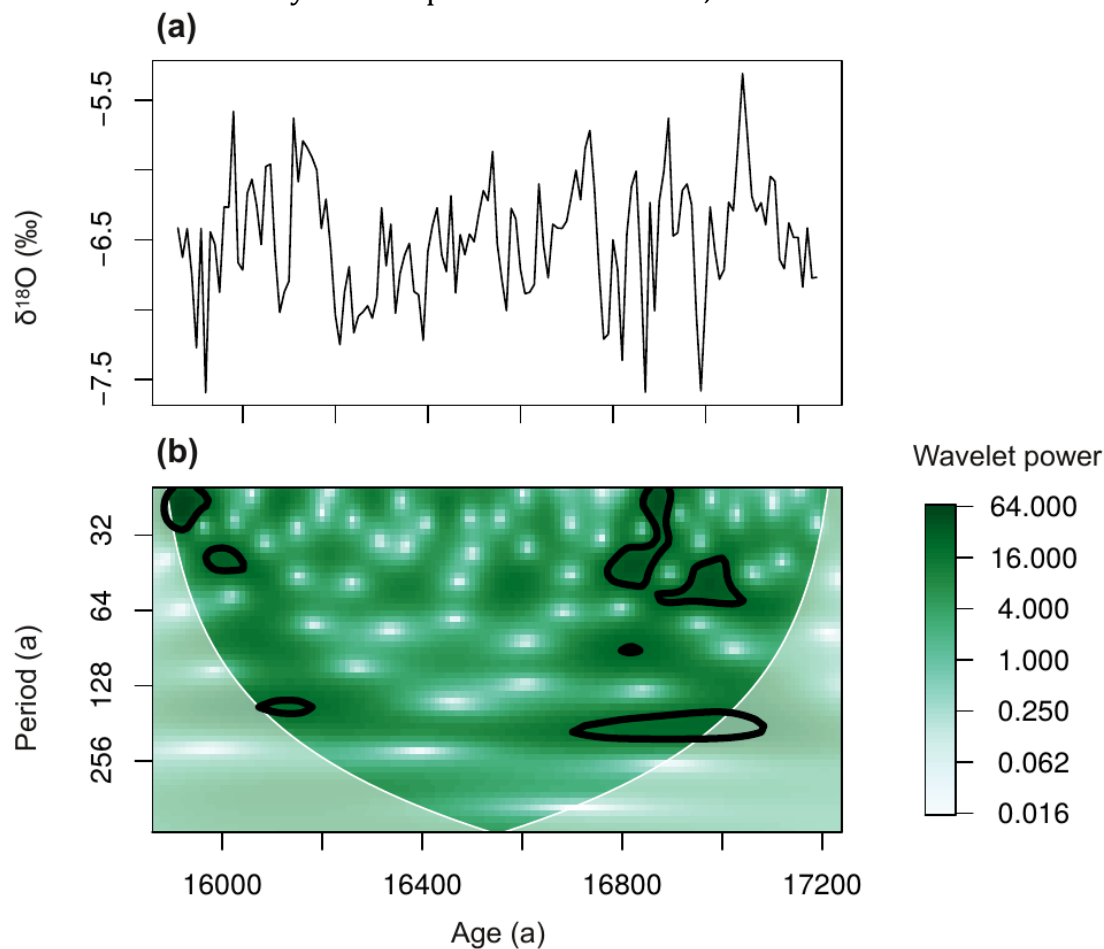

Wavelet power for MC-S1  $\delta^{18}\text{O}$ . Panel **a** shows the time series interpolated onto a regular grid, **b** shows the wavelet power analysed using a Morlet wavelet and a continuous wavelet transform (Torrence and Compo, 1998) implemented by the *biwavelet* R package (Gouhier et al., 2017). The wavelet power is bias-corrected following Liu et al. (2007); the black contour lines enclose regions with a significance level  $> 0.95$  according to a  $\chi^2$  test. The global wavelet spectrum, i.e. the time average of the power spectrum, has a broad peak centred on  $\sim 180$  a in agreement with the Lomb-Scargle method presented in the main text.

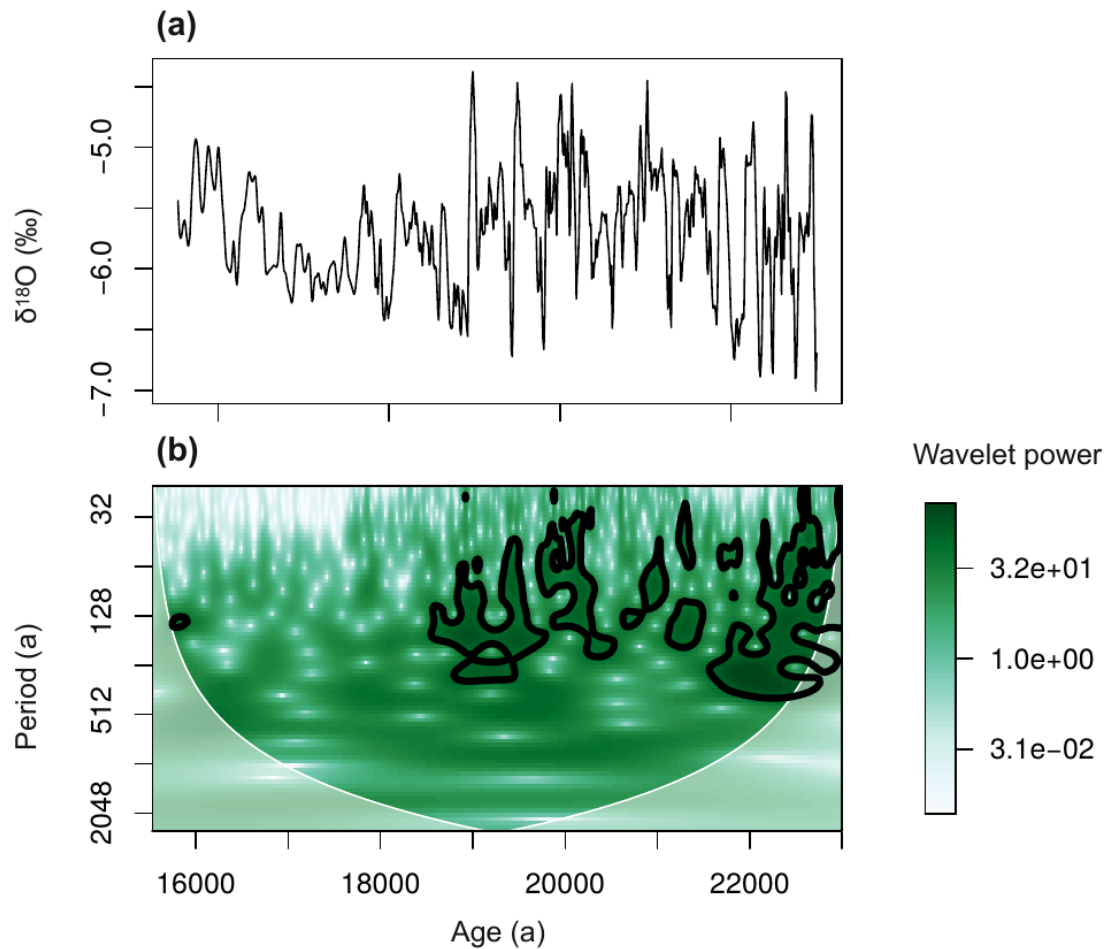

*Wavelet power for MC-S2  $\delta^{18}O$ , where panels have the same meaning as the previous figure. The power spectrum in MC-S2 has more structure than MC-S1, partly because it is longer. Like MC-S1, there is a peak in the global wavelet spectrum at  $\sim 180$  a. The 180 a period is usually present over time, but falls below the threshold of the  $\chi^2$  test between 16 and 18.5 ka. The apparent decrease in low-frequency power around 16 to 18 ka is an artefact of the interpolation applied to the more widely-spaced samples in the original data during this period.*

## References

Gouhier, T. C., Grinsted, A., and Simko, V. 2017. R package “biwavelet”: Conduct Univariate and Bivariate Wavelet Analyses (Version 0.20.15). Available from <https://github.com/tgouhier/biwavelet>

Liu, Y., X. San Liang, and R. H. Weisberg. 2007. Rectification of the Bias in the Wavelet Power Spectrum. *Journal of Atmospheric and Oceanic Technology* 24:2093-2102.

Torrence, C., and G. P. Compo. 1998. A practical guide to wavelet analysis. *Bulletin of the American Meteorological Society* 79:61–78.
